# Supplementary material for: Thromboembolic Risk in Patients With Pneumonia and New-Onset Atrial Fibrillation Not Receiving Anticoagulation Therapy
Source: PubMed Central journal article supplement (PMC9136621; doi:10.1001/jamanetworkopen.2022.13945), 2022-05-26

## Supplemental Online Content

Søgaard M, Skjøth F, Nielsen PB, et al. Thromboembolic risk in patients with pneumonia and new-onset atrial fibrillation not receiving anticoagulation therapy. *JAMA Netw Open*. 2022;5(5):e2213945. doi:10.1001/jamanetworkopen.2022.13945

**eTable 1.** Definitions on Comorbidity and Concomitant Medication According to ICD-10 Codes and ATC-codes

**eTable 2.** Risk Score Definition

**eTable 3.** Results of Sensitivity Analyses Among Patients With an Indication for OAC Therapy (i.e., Intermediate or High Baseline Stroke Risk)

**eFigure.** Flow Diagram of the Cohort Creation Process

This supplemental material has been provided by the authors to give readers additional information about their work.

**eTable 1.** Definitions on comorbidity and concomitant medication according to International Classification of Diseases (ICD) codes and Anatomic Therapeutic Chemical (ATC) codes.

| Disease                          | ICD-8 codes                            | ICD-10 codes                                                                                                                                                                                                                                                                                                                                                                                                                                        | ATC-code |
|----------------------------------|----------------------------------------|-----------------------------------------------------------------------------------------------------------------------------------------------------------------------------------------------------------------------------------------------------------------------------------------------------------------------------------------------------------------------------------------------------------------------------------------------------|----------|
| <b>Study population</b>          |                                        |                                                                                                                                                                                                                                                                                                                                                                                                                                                     |          |
| Pneumonia                        |                                        | J12 J13 J14 J15 J16 J17 J18                                                                                                                                                                                                                                                                                                                                                                                                                         |          |
| <b>Exposure</b>                  |                                        |                                                                                                                                                                                                                                                                                                                                                                                                                                                     |          |
| Atrial Fibrillation              | 42793 42794                            | I48                                                                                                                                                                                                                                                                                                                                                                                                                                                 |          |
| <b>Exclusion criteria</b>        |                                        |                                                                                                                                                                                                                                                                                                                                                                                                                                                     |          |
| Oral anticoagulant use           |                                        |                                                                                                                                                                                                                                                                                                                                                                                                                                                     |          |
| Warfarin                         |                                        |                                                                                                                                                                                                                                                                                                                                                                                                                                                     | B01AA03  |
| Dabigatran                       |                                        |                                                                                                                                                                                                                                                                                                                                                                                                                                                     | B01AE07  |
| Rivaroxaban                      |                                        |                                                                                                                                                                                                                                                                                                                                                                                                                                                     | B01AF01  |
| Apixaban                         |                                        |                                                                                                                                                                                                                                                                                                                                                                                                                                                     | B01AF02  |
| Edoxaban                         |                                        |                                                                                                                                                                                                                                                                                                                                                                                                                                                     | B01AF03  |
| <b>Outcomes</b>                  |                                        |                                                                                                                                                                                                                                                                                                                                                                                                                                                     |          |
| Ischemic stroke                  | 43300 43309 43409<br>43499 43601 43690 | I63                                                                                                                                                                                                                                                                                                                                                                                                                                                 |          |
| Arterial embolism and thrombosis | 444                                    | I74                                                                                                                                                                                                                                                                                                                                                                                                                                                 |          |
| <b>Comorbidity</b>               |                                        |                                                                                                                                                                                                                                                                                                                                                                                                                                                     |          |
| Prior bleeding                   |                                        | I850 I864A K226 K228F K250 K252<br>K254 K256 K260 K262 K264 K266<br>K270 K272 K274 K276 K280 K282<br>K284 K286 K290 K298A K625 K638B<br>K638C K661 K838F K868G K920<br>K921 K922 I60 I61 I62 I690 I691 I692<br>S063C S064 S065 S066 S068B S068D<br>S141C S141D S141E S241D S241E<br>S241F S341D S341E S341F E078B<br>E274B G951A I312 I319A I230 J942<br>M250 R04 S259A S368A S368B<br>S368D T143C T144A D500 D62 D683<br>D698 D699 R58 T792A T792B |          |
| Renal disease                    |                                        | I12 I13 N00 N01 N02 N03 N04 N05<br>N07 N11 N14 N18 N19 Q61 N17                                                                                                                                                                                                                                                                                                                                                                                      |          |
| Alcohol related disease          |                                        | E244 E529a F105 F106 F107 F108<br>F109 G312 G621 G721 I426 K292 K70<br>K852 K860 I278a O354 P043                                                                                                                                                                                                                                                                                                                                                    |          |
| Heart failure                    |                                        | I110 I130 I132 I420 I50 I426<br>I427 I429                                                                                                                                                                                                                                                                                                                                                                                                           |          |
| Diabetes                         | 24900 24909 25008<br>25009             | E10 E11                                                                                                                                                                                                                                                                                                                                                                                                                                             | A10      |
| Vascular disease                 |                                        | I700 I702 I708 I709 I739                                                                                                                                                                                                                                                                                                                                                                                                                            |          |
| Hypertension*                    |                                        | I10 I11 I12 I13 I15                                                                                                                                                                                                                                                                                                                                                                                                                                 |          |
| COPD                             |                                        | J44                                                                                                                                                                                                                                                                                                                                                                                                                                                 |          |
| Cancer                           |                                        | C                                                                                                                                                                                                                                                                                                                                                                                                                                                   |          |
| Ischemic heart disease           |                                        | I20 I21 I23 I24 I25                                                                                                                                                                                                                                                                                                                                                                                                                                 |          |
| Myocardial infarction            |                                        | I21 I23                                                                                                                                                                                                                                                                                                                                                                                                                                             |          |
| VTE                              |                                        | H348e H348f I26 I636 I676 I801I802<br>I803 I808 I809 I81 I822 I823 I828<br>I829 O223 O225 O229 O871 O879<br>O873 O882 T817c T817d                                                                                                                                                                                                                                                                                                                   |          |
| <b>Comedications, %(N)</b>       |                                        |                                                                                                                                                                                                                                                                                                                                                                                                                                                     |          |

|                                                 |  |  |                                                                              |
|-------------------------------------------------|--|--|------------------------------------------------------------------------------|
| Digoxin                                         |  |  | C01AA05                                                                      |
| Clopidogrel                                     |  |  | B01AC04                                                                      |
| Aspirin                                         |  |  | B01AC06                                                                      |
| Renin-angiotensin system inhibitors (ACEi/ARBs) |  |  | C09                                                                          |
| Statins                                         |  |  | C10                                                                          |
| NSAID                                           |  |  | M01AA M01AB<br>M01AC M01AE<br>M01AG M01AH<br>M01AX01                         |
| Beta-blocker                                    |  |  | C07                                                                          |
| Calcium channel blocker                         |  |  | C07F C08 C09BB<br>C09DB                                                      |
| Loop diuretics                                  |  |  | C03C C03EB                                                                   |
| Non-loop diuretics                              |  |  | C02DA C02L C03A<br>C03B C03D C03E<br>C03X C07C C07D<br>C09BA C09DA<br>09XA52 |
| Proton-pump inhibitors                          |  |  | A02BC                                                                        |
| Antibiotics                                     |  |  | J01                                                                          |

\*\*We identified subjects with hypertension from diagnosis codes in the National Patient Registry and/or combination treatment with at least two of the following classes of antihypertensive drugs obtained from the Danish National Laboratory Registry:

- I. Alpha adrenergic blockers (C02A, C02B, C02C)
- II. Non-loop diuretics (C02DA, C02L, C03A, C03B, C03D, C03E, C03X, C07C, C07D, C08G, C09BA, C09DA, C09XA52)
- III. Vasodilators (C02DB, C02DD, C02DG, C04, C05)
- IV. Beta blockers (C07)
- V. Calcium channel blockers (C07F, C08, C09BB, C09DB)
- VI. Renin-angiotensin system inhibitors (C09).

**eTable 2.** Risk score definitions.

| <b>Risk score</b>                                                                       | <b>Points if present</b> |
|-----------------------------------------------------------------------------------------|--------------------------|
| <b>CHA<sub>2</sub>DS<sub>2</sub>-VASc*</b>                                              |                          |
| Congestive heart failure or Left Ventricular Dysfunction                                | 1                        |
| Hypertension                                                                            | 1                        |
| Age 65-74 years                                                                         | 1                        |
| Age ≥ 75 years                                                                          | 2                        |
| Diabetes mellitus                                                                       | 1                        |
| Stroke (ischemic stroke, transient ischemic disease or systemic embolism)               | 2                        |
| Vascular disease (myocardial infarction, peripheral arterial disease, or aortic plaque) | 1                        |
| Sex category (female)                                                                   | 1                        |
| <b>HAS-BLED†</b>                                                                        |                          |
| Hypertension**                                                                          | 1                        |
| Abnormal renal function                                                                 | 1                        |
| Abnormal hepatic function                                                               | 1                        |
| Stroke (ischemic stroke or transient ischemic attack)                                   | 1                        |
| Bleeding                                                                                | 1                        |
| Labile international normalized ratio‡                                                  | 1                        |
| Elderly age (> 65 years)                                                                | 1                        |
| Drugs (aspirin, clopidogrel, or non-steroidal anti-inflammatory drugs)                  | 1                        |
| Alcohol intake                                                                          | 1                        |

\*Reflects stroke risk in atrial fibrillation patients not in anticoagulant therapy (Lip GYH, Nieuwlaat R, Pisters R, Lane DA, Crijns HJGM. Refining clinical risk stratification for predicting stroke and thromboembolism in atrial fibrillation using a novel risk factor-based approach: the euro heart survey on atrial fibrillation. *Chest* 2010;137(2):263-72)

†Reflects bleeding risk in atrial fibrillation patients undergoing anticoagulant therapy (Pisters R, Lane DA, Nieuwlaat R, de Vos CB, Crijns HJGM, Lip GYH. A novel user-friendly score (HAS-BLED) to assess 1-year risk of major bleeding in patients with atrial fibrillation: the Euro Heart Survey. *Chest* 2010;138(5):1093-100).

‡Not included due to unavailable information

\*\*\*\*We identified subjects with hypertension from diagnosis codes in the National Patient Registry and/or combination treatment with at least two of the following classes of antihypertensive drugs obtained from the Danish National Laboratory Registry:

I. Alpha adrenergic blockers (C02A, C02B, C02C)

- II. Non-loop diuretics (C02DA, C02L, C03A, C03B, C03D, C03E, C03X, C07C, C07D, C08G, C09BA, C09DA, C09XA52)
- III. Vasodilators (C02DB, C02DD, C02DG, C04, C05)
- IV. Beta blockers (C07)
- V. Calcium channel blockers (C07F, C08, C09BB, C09DB)
- VI. Renin-angiotensin system inhibitors (C09).

**eTable 3.** Results of sensitivity analyses among patients with new-onset atrial fibrillation with an indication for OAC therapy (i.e, intermediate or high baseline stroke risk).

| Analyses/strata                                                                                                              | Thromboembolism, % <sup>#</sup> |                      | AF rehospitalization, % |                      | OAC initiation, %  |                      | All-cause death, % |                      |
|------------------------------------------------------------------------------------------------------------------------------|---------------------------------|----------------------|-------------------------|----------------------|--------------------|----------------------|--------------------|----------------------|
|                                                                                                                              | One-year follow-up              | Three-year follow-up | One-year follow-up      | Three-year follow-up | One-year follow-up | Three-year follow-up | One-year follow-up | Three-year follow-up |
| Stratification of baseline hazard function by inclusion period with interactions between inclusion period and all covariates |                                 |                      |                         |                      |                    |                      |                    |                      |
| Intermediate stroke risk                                                                                                     | 1.5                             | 3.5                  | _*                      | _*                   | _*                 | _*                   | _*                 | _*                   |
| High stroke risk                                                                                                             | 2.8                             | 5.1                  | _*                      | _*                   | _*                 | _*                   | _*                 | _*                   |
| Restriction of study period to 2014-2018                                                                                     |                                 |                      |                         |                      |                    |                      |                    |                      |
| Intermediate stroke risk                                                                                                     | 1.3                             | 2.6 <sup>†</sup>     | 26.0                    | 23.2                 | 20.8               | 31.1                 | 29.6               | 48.7                 |
| High stroke risk                                                                                                             | 2.5                             | 4.3 <sup>†</sup>     | 35.8                    | 33.3                 | 17.0               | 21.6                 | 33.0               | 60.0                 |
| Exclusion of patients with baseline aspirin treatment                                                                        |                                 |                      |                         |                      |                    |                      |                    |                      |
| Intermediate stroke risk                                                                                                     | 1.6                             | 3.5                  | _*                      | _*                   | _*                 | _*                   | _*                 | _*                   |
| High stroke risk                                                                                                             | 3.1                             | 3.7                  | _*                      | _*                   | _*                 | _*                   | _*                 | _*                   |

Death was treated as a competing risk. #Patients were censored if they started anticoagulation therapy and were weighted by the inverse of the probability of being censored. \*IPCW methods were not used for assessment of secondary outcomes, because patients were not censored based on use of anticoagulants. †Follow-up for a maximum of three years or until administrative censoring at December 31, 2018.

**eFigure.** Flow diagram of the cohort creation process

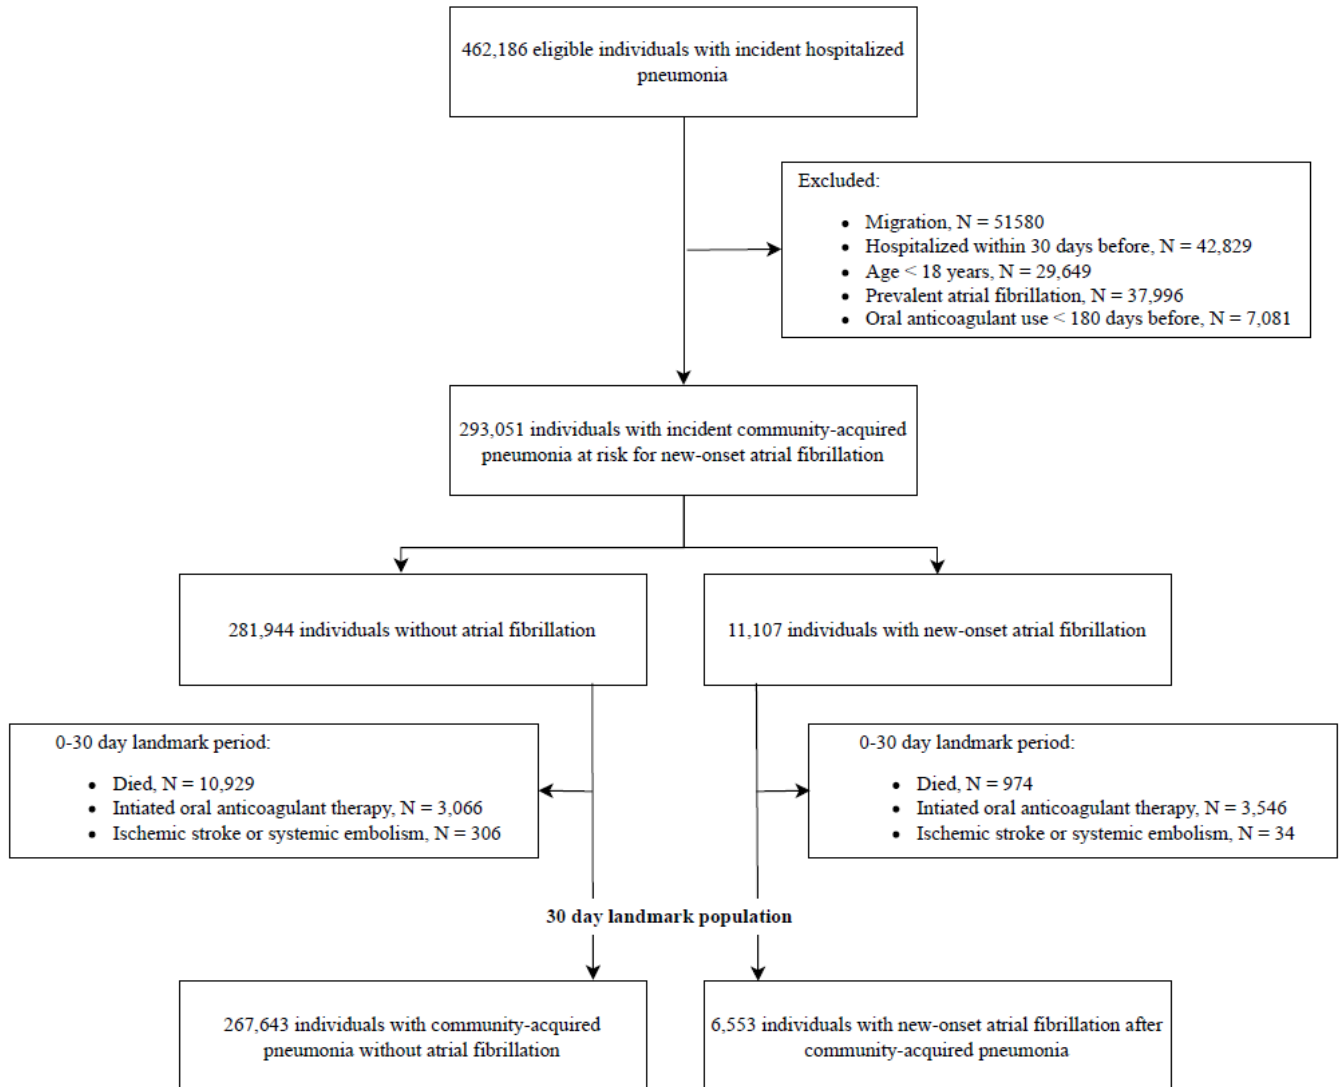

Supplement: jamanetwopen-e2213945-s001.pdf [file jamanetwopen-e2213945-s001.pdf]
